# Supplementary material for: Limited role for ASC and NLRP3 during in vivo Salmonella Typhimurium infection
Source: Springer Nature journal article supplement (doi:10.1186/s12865-014-0030-7), 2014-08-12
Supplement: MOESM1 [file 9736000]

**Additional file 1. Severe intestinal pathology seen in mice pretreated with streptomycin (colitis model) post infection with *S. Typhimurium***

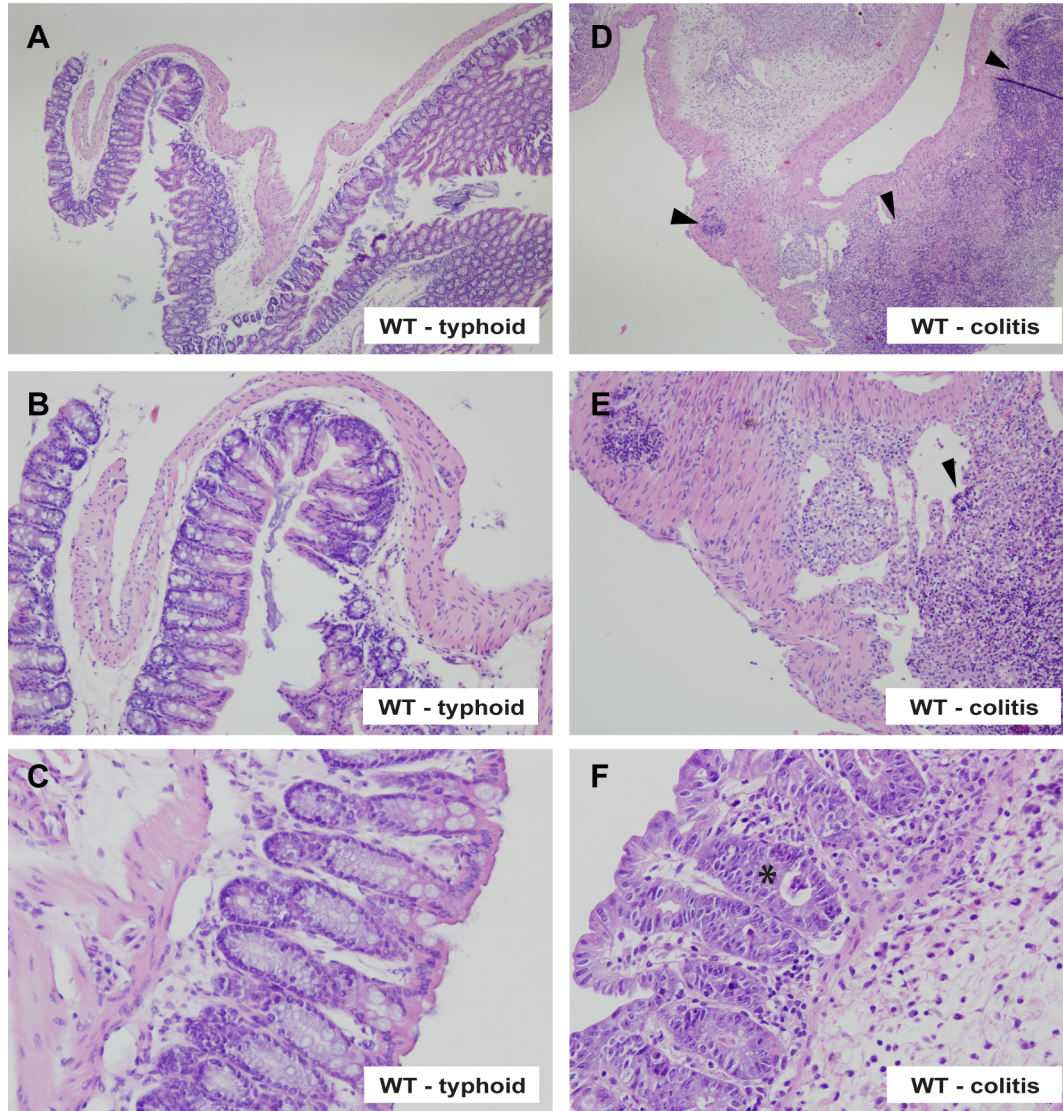

Wild-type (WT) mice were starved for 12 h (typhoid fever model) or pretreated with streptomycin (colitis model) before infection with *S. Typhimurium* ( $10^6$ ) per os and sacrificed post-infection to assess intestinal pathology. Representative photographs of haematoxylin and eosin (HE) stained slides are displayed of the cecum of the typhoid model (A-C) and colitis model (D-F) 4-5 days post infection. Original magnifications.  $\times 4$  (A, D),  $\times 10$  (B, E), and  $\times 20$  (C, F). Severe intestinal pathology characterized by neutrophil infiltration, edema and extensive destructive ulceration of the mucosa is

seen in mice pretreated with streptomycin (colitis model) but not in a typhoid fever model. Arrowheads indicate severe colitis in mice pretreated with streptomycin accompanied by crypt abscesses (\*).
